# Supplementary material for: Molecular Dynamics Simulation of Transport Mechanism of Graphene Quantum Dots through Different Cell Membranes
Source: MDPI journal article supplement (doi:10.3390/membranes12080753), 2022-07-31
Supplement: s1 [file s1]

## Supplementary Materials

# Molecular Dynamics Simulation of Transport Mechanism of Graphene Quantum Dots Through Different Cell Membranes

Pengzhen Zhang <sup>1,†</sup>, Fangfang Jiao <sup>2,†</sup>, Lingxiao Wu <sup>1</sup>, Zhe Kong <sup>1,\*</sup>, Wei Hu <sup>2,\*</sup>, Lijun Liang <sup>3</sup> and Yongjun Zhang <sup>1</sup>

<sup>1</sup>. Center of Advanced Optoelectronic Materials and Devices, Key Laboratory of Novel Materials for Sensor of Zhejiang Province, College of Materials and Environmental Engineering, Hangzhou Dianzi University, Hangzhou 310018, China; 13519288162@163.com (P.Z.), wxl\_1171999418@163.com (L.W.), yjzhang@hdu.edu.cn (Y.Z.)

<sup>2</sup>. Shandong Provincial Key Laboratory of Molecular Engineering, School of Chemistry and Pharmaceutical Engineering, Qilu University of Technology (Shandong Academy of Sciences), Jinan 250353, People's Republic of China, [jiao1313@outlook.com](mailto:jiao1313@outlook.com)

<sup>3</sup>. College of Automation, Hangzhou Dianzi University, Hangzhou 310018, China, [michael.lijun@gmail.com](mailto:michael.lijun@gmail.com)

† P. Z. Z and F. F. J. contributed equally to this work.

\* Correspondence: zhekong@hdu.edu.cn (Z.K.); [weiuhu@qlu.edu.cn](mailto:weiuhu@qlu.edu.cn) (W.H.) Fax: +86 571 87713538

**Table S1.** Details of simulation calculations.

| System       | No. of atoms | No. of water molecules | Simulation method | GQD:lipid | Time (ns) |
|--------------|--------------|------------------------|-------------------|-----------|-----------|
| GQDs-POPC    | 117,653      | 26,939                 | MD                | 1:274     | 200       |
| GQDs-DOPE    | 126,576      | 29,624                 | MD                | 1:316     | 200       |
| GQDs-POPE    | 129,756      | 27,902                 | MD                | 1:342     | 200       |
| GQDs-POPE-LD | 138669       | 31933                  | MD                | 1:342     | 200       |
| GQDs-POPC    | 117,653      | 26,939                 | SMD               | 1:274     | 10        |
| GQDs-DOPE    | 126,576      | 29,624                 | SMD               | 1:316     | 10        |
| GQDs-POPE    | 129,756      | 27,902                 | SMD               | 1:342     | 10        |
| GQDs-POPE-LD | 138669       | 31933                  | SMD               | 1:342     | 10        |
| GQDs-POPC    | 117,653      | 26,939                 | PMF               | 1:274     | S*10      |
| GQDs-DOPE    | 126,576      | 29,624                 | PMF               | 1:316     | S*10      |
| GQDs-POPE    | 129,756      | 27,902                 | PMF               | 1:342     | S*10      |
| GQDs-POPE-LD | 138669       | 31933                  | PMF               | 1:342     | S*10      |

## MD Simulation

MD simulations were performed using Gromacs5.0 software [1]. The charge of the carbon atom at the edge of GQDs was set to +1.15e; the charge of the hydrogen atom connected to the carbon atom was set to -1.15e, and the remaining carbon atom charge was considered neutral [2]. The relevant parameters of GQDs, including the harmonic bond potentials of C-C and C-H, the harmonic angles of C-C-H and C-C-C, the harmonic dihedrals potential, and Lennard-Jones (LJ), were taken from ref [3]. LJ and charge parameters are listed in Table 2. These parameters have been successfully used to explore the interaction between GQDs and DNA, and the transmembrane transport of GQDs [2,4–7]. All systems were subjected to 50,000 steps of energy minimization and 1 ns pre-equilibration before the MD simulation. All bond lengths and all angles involving hydrogen atoms were constrained using the LINCS algorithm. The NPT ensemble was used in the simulation with a constant temperature of 314 K imposed by a Berendsen thermostat and 1 bar of pressure controlled by a semi-isotropic Parrinello–Rahman barostat. The cutoff for the nonbonded van der Waals interaction was set by a switching function starting at 1.0 nm and reaching zero at 1.2 nm. The long-range electrostatic interaction was calculated by particle mesh Ewald (PME) summation, with a cutoff of 1.2 nm for the separation of the direct and reciprocal space summation.

**Table S2.** The LJ and charge parameters used in the MD

| Element               | C(sp2) | C <sub>CH</sub> | H <sub>CH</sub> |
|-----------------------|--------|-----------------|-----------------|
| $\epsilon$ (kcal/mol) | 0.0859 | 0.046           | 0.0301          |
| $\sigma$ (Å)          | 3.3997 | 2.985           | 2.42            |
| q(e)                  | 0      | -0.115          | 0.115           |
| Reference             | [8]    | [9]             | [9]             |

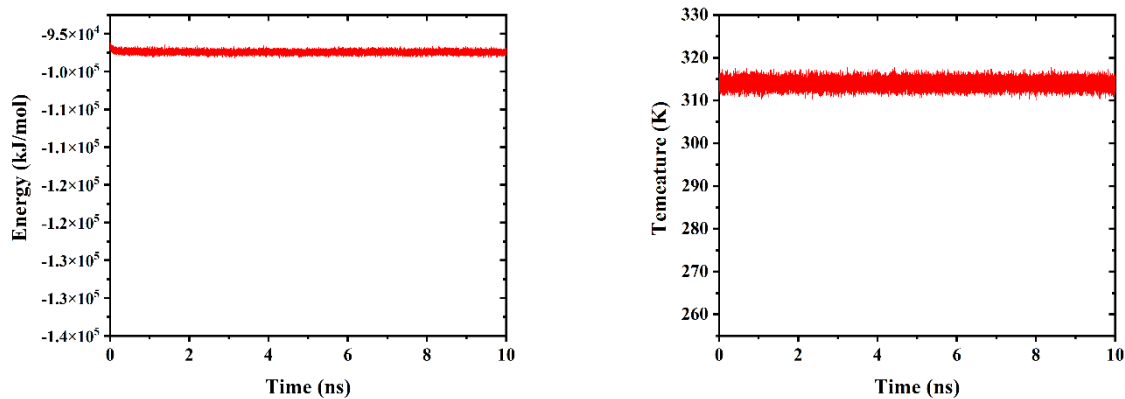**Figure S1.** Changes in energy and temperature of the system.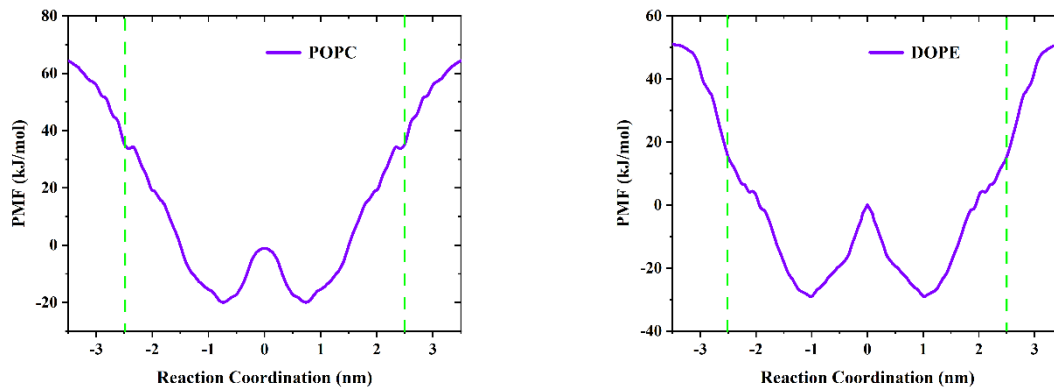**Figure S2.** The average force (PMF) potential of QDs transport through the membrane. The green dotted line indicates the two boundaries of the cell membrane.

## References

1. Mja, A.; Tm, D.; Rsb, C.; Sp, A.; Jcsb, C.; Bh, A.; Ela, D. GROMACS: High performance molecular simulations through multi-level parallelism from laptops to supercomputers - ScienceDirect. *SoftwareX* **2015**, 1–2, 19–25, doi:10.1016/j.softx.2015.06.001.
2. Liang, L.; Kong, Z.; Kang, Z.; Wang, H.; Zhang, L.; Shen, J.W. Theoretical Evaluation on Potential Cytotoxicity of Graphene Quantum Dots. *ACS Biomater. Sci. Eng.* **2016**, 2, 1983–1991, doi:10.1021/acsbomaterials.6b00390.
3. Cohen-Tanugi, D.; Grossman, J.C. Water Desalination across Nanoporous Graphene. *Nano Lett.* **2012**, 12, 3602–3608, doi:10.1021/nl3012853.
4. Kong, Z.; Hu, W.; Jiao, F.; Zhang, P.; Shen, J.; Cui, B.; Wang, H.; Liang, L. Theoretical Evaluation of DNA Genotoxicity of Graphene Quantum Dots: A Combination of Density Functional Theory and Molecular Dynamics Simulations. *J. Phys. Chem. B* **2020**, 124, 9335–9342, doi:10.1021/acs.jpcc.0c05882.
5. Li, J.; Zhang, Y.; Yang, J.; Bi, K.; Ni, Z.; Li, D.; Chen, Y. Molecular dynamics study of DNA translocation through graphene nanopores. *Phys Rev E Stat Nonlin Soft Matter Phys* **2013**, 87, 062707, doi:10.1103/PhysRevE.87.062707.

- 
6. Zhang, L.; Xu, B.; Wang, X. Cholesterol Extraction from Cell Membrane by Graphene Nanosheets: A Computational Study. *J. Phys. Chem. B* **2016**, *120*, 957–964, doi:10.1021/acs.jpcc.5b10330.
  7. Chen, J.; Zhou, G.; Chen, L.; Wang, Y.; Wang, X.; Zeng, S. Interaction of Graphene and its Oxide with Lipid Membrane: A Molecular Dynamics Simulation Study. *J. Phys. Chem. C* **2016**, *120*, 6225–6231, doi:10.1021/acs.jpcc.5b10635.
  8. Beu, T.A. Molecular dynamics simulations of ion transport through carbon nanotubes. I. Influence of geometry, ion specificity, and many-body interactions. *J. Chem. Phys.* **2010**, *132*, 164513, doi:10.1063/1.3387972.
  9. Mooney, D.A.; Müller-Plathe, F.; Kremer, K.J.C.P.L. Simulation studies for liquid phenol: properties evaluated and tested over a range of temperatures. *Chem. Phys. Lett.* **1998**, *294*, 135–142, doi:10.1016/S0009-2614(98)00860-4.
